# Supplementary material
Source: HighWire-hosted journal article supplement (https://www.cmaj.ca/highwire/filestream/58902/field_highwire_adjunct_files/0/stroke-kapral-1-at.pdf)

Appendix 1 (as supplied by the authors): Map of Local Health Integration Network boundaries, Ontario Stroke System regions and stroke centre classifications

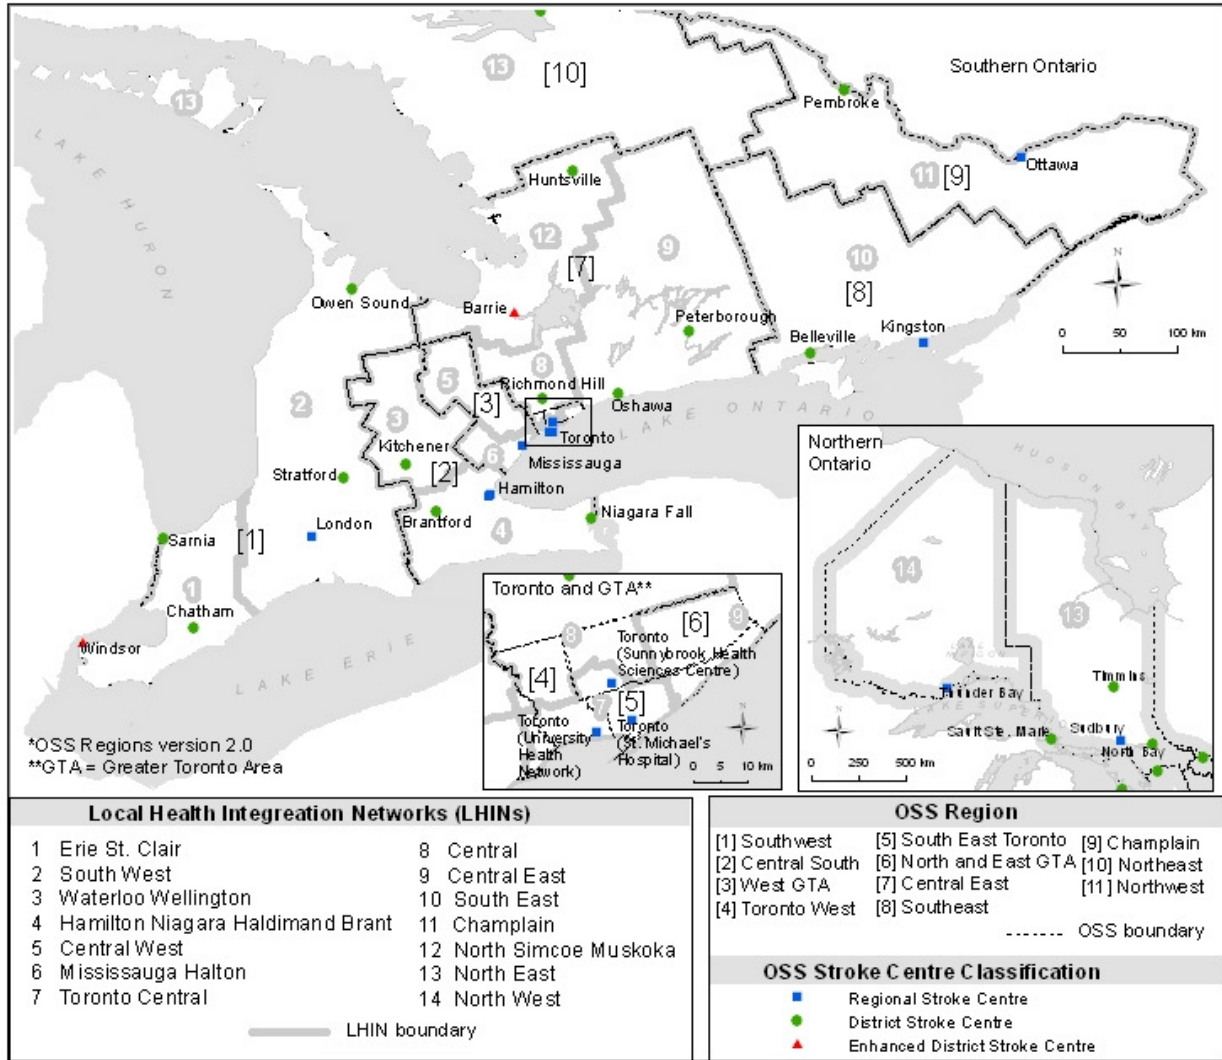

Supplement: stroke-kapral-1-at.pdf [file stroke-kapral-1-at.pdf]
